# Supplementary material for: The Complex Effects of PKM2 and PKM2:IP3R Disruption on Intracellular Ca2+ Handling and Cellular Functions
Source: MDPI journal article supplement (doi:10.3390/cells12212527), 2023-10-26
Supplement: s1 [file s1]

# Supplementary Materials

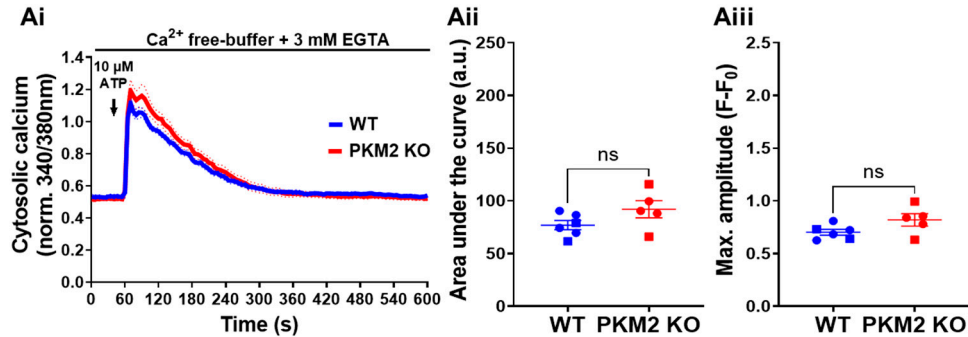

**Figure S1.** (Ai) Time-course of the Ca<sup>2+</sup> responses evoked by 10  $\mu$ M ATP in HeLa WT (blue) and HeLa PKM2 KO (red) cells. The single-cell Ca<sup>2+</sup> signals were measured in the absence of extracellular Ca<sup>2+</sup> in cells loaded with Fura-2 AM. As indicated by the arrow, 10  $\mu$ M ATP was added after 60 s of baseline measurement. The curves are presented as the mean (bold line)  $\pm$  SEM (dashed line) of 2 independent experiments, each performed on 2-4 coverslips/experiment, >45 cells/coverslip. (Aii) Quantification of the area under the curve and (Aiii) maximal amplitude of the Ca<sup>2+</sup> signals induced by 10  $\mu$ M ATP, shown in Ai. Significance was analyzed with Student's t-test (ns = no statistical difference).

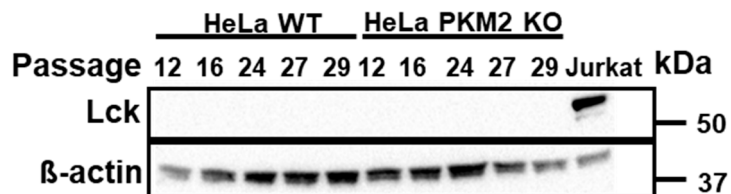

**Figure S2.** Western blot showing that HeLa WT and PKM2 KO cells do not express Lck. Cell lysates from 5 different passages are shown.  $\beta$ -actin was used as loading control. Anti-Lck antibody was diluted 1:1000. A Jurkat T cell lysate was used as positive control.
